# Supplementary material for: Impact of transcranial magnetic stimulation on motor function in children with acquired brain injury: a scoping review protocol
Source: HighWire-hosted journal article supplement (doi:10.1136/bmjpo-2023-001885), 2023-05-01
Supplement: bmjpo-2023-001885supp001_data_supplement.pdf [file bmjpo-2023-001885supp001_data_supplement.pdf]

**Appendix: Search Strategy: Ovid MEDLINE(R) ALL <1946 to Present>**

- 1 exp Child/
- 2 exp Adolescent/
- 3 (p?ediatric\* or child\* or youth\* or adolescen\* or juvenile\* or teenage\* or boy\* or girl\*).ab,jn,ti.
- 4 1 or 2 or 3
- 5 exp Brain Injuries/ or exp Craniocerebral Trauma/ or exp Skull Fractures/
- 6 ((brain or head or skull or cranio\* or cranial or occipital) adj3 (injur\* or trauma\* or fracture\*)).ab,ti.
- 7 exp Meningitis/
- 8 Meningitis.ab,ti.
- 9 exp Encephalitis/
- 10 Encephalitis.ab,ti.
- 11 exp Stroke/
- 12 (Stroke or cerebrovascular accident\*).ab,ti.
- 13 exp Arteriovenous Malformations/
- 14 Arteriovenous Malformation\*.ab,ti.
- 15 exp Intracranial Aneurysm/
- 16 ((intracranial or brain or cerebral) adj3 Aneurysm\*).ab,ti.
- 17 exp Cerebral Hemorrhage/ or exp Intracranial Hemorrhages/
- 18 ((intracranial or brain or cerebral) adj3 H?emorrhage\*).ab,ti.
- 19 exp Hypoxia, Brain/ 14043
- 20 ((brain or cerebral or encephalopath\*) adj3 (hypox\* or anox\*)).ab,ti.
- 21 exp Asphyxia/

- 22 "asphyxia\*".ab,ti.
- 23 exp Brain Neoplasms/ or exp Central Nervous System Neoplasms/
- 24 (((brain or cerebral or CNS or central nervous system) and (tumo?r\* or glioma\* or blastoma\* or sarcoma\* or cancer\* or neoplasm\* or astrocytoma\* or ependymoma\* or glioblastoma\* or oligoastrocytoma\* or oligodendroglioma\* or Meningioma\* or medulloblastoma\*)) or "posterior fossa syndrome").ab,ti.
- 25 5 or 6 or 7 or 8 or 9 or 10 or 11 or 12 or 13 or 14 or 15 or 16 or 17 or 18 or 19 or 20 or 21 or 22 or 23 or 24
- 26 exp Transcranial Magnetic Stimulation/
- 27 (Transcranial adj2 magnetic adj2 stimulation\*).ab,ti.
- 28 exp Transcranial Direct Current Stimulation/
- 29 (noninvasive adj2 brain adj2 stimulation).ab,ti.
- 30 (noninvasive adj2 cerebral adj2 stimulation).ab,ti.
- 31 (Transcranial adj2 direct adj2 Current adj2 Stimulation).ab,ti.
- 32 (electromagnetic induction and brain).ab,ti.
- 33 (TMS or rTMS or NIBS or NrTMS).ab,ti.
- 34 (transcranial adj2 electric\* adj2 stimulation).ab,ti.
- 35 ((Anodal or Cathodal) and stimulation TDCS).ab,ti.
- 36 transcranial random noise stimulation.ab,ti.
- 37 transcranial alternating current stimulation.ab,ti.
- 38 Theta Burst Stimulation.ab,ti.
- 39 26 or 27 or 28 or 29 or 30 or 31 or 32 or 33 or 34 or 35 or 36 or 37 32106
- 40 4 and 25 and 39

\*\*\*\*\*
